# Supplementary material for: In Vivo Yeast Cell Morphogenesis Is Regulated by a p21-Activated Kinase in the Human Pathogen Penicillium marneffei
Source: PubMed Central journal article supplement (PMC2777384; doi:10.1371/journal.ppat.1000678), 2009-11-26

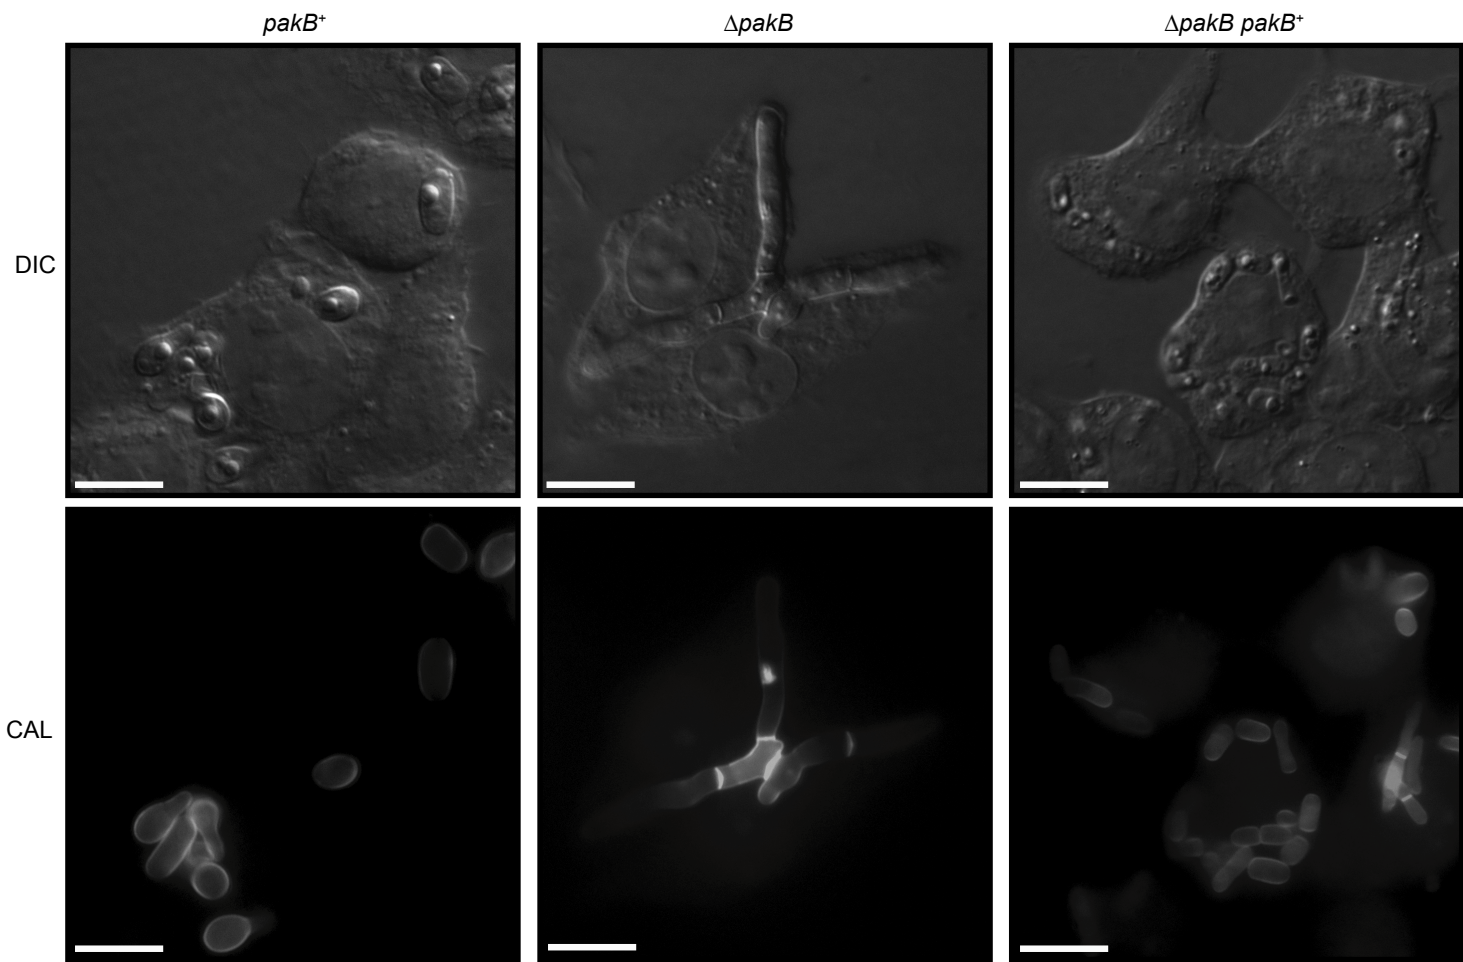

Supplement: ppat.1000678.s002.pdf [file ppat.1000678.s002.pdf]
