# Supplementary material for: In Vivo Yeast Cell Morphogenesis Is Regulated by a p21-Activated Kinase in the Human Pathogen Penicillium marneffei
Source: PubMed Central journal article supplement (PMC2777384; doi:10.1371/journal.ppat.1000678), 2009-11-26
Supplement: ppat.1000678.s004.pdf [file ppat.1000678.s004.pdf]

| <b>Strain Name</b>             | <b>Percentage of septate cells</b> |
|--------------------------------|------------------------------------|
| <i>pakB</i> <sup>+</sup>       | 17.2 ± 3.70                        |
| $\Delta pakB$                  | 71.1 ± 2.24                        |
| $\Delta pakB pakB^{+2.1}$      | 21.6 ± 0.50                        |
| $\Delta pakB pakB^{+2.2}$      | 16.9 ± 1.00                        |
| $\Delta pakB pakB^{+2.3}$      | 17.5 ± 0.58                        |
| $\Delta pakB pakB^{+2.4}$      | 22.0 ± 2.03                        |
| $\Delta pakB pakB^{H204G}$ 1.1 | 23.0 ± 2.90                        |
| $\Delta pakB pakB^{H204G}$ 1.3 | 19.1 ± 3.21                        |
| $\Delta pakB pakB^{H204G}$ 1.4 | 22.0 ± 2.09                        |
| $\Delta pakB pakB^{H204G}$ 2.4 | 24.7 ± 2.12                        |
| $\Delta pakB pakB^{ACRIB}$ 2.1 | 40.9 ± 4.34                        |
| $\Delta pakB pakB^{ACRIB}$ 2.3 | 45.4 ± 4.22                        |
| $\Delta pakB pakB^{ACRIB}$ 2.4 | 43.3 ± 4.94                        |
| $\Delta pakB pakB^{ACRIB}$ 2.5 | 40.8 ± 2.71                        |
| $\Delta pakB pakB^{ABBD}$ 2.1  | 60.4 ± 1.57                        |
| $\Delta pakB pakB^{ABBD}$ 2.2  | 60.4 ± 0.50                        |
| $\Delta pakB pakB^{ABBD}$ 2.4  | 66.9 ± 2.26                        |
| $\Delta pakB pakB^{ABBD}$ 2.6  | 61.2 ± 3.17                        |
