# Supplementary material for: In Vivo Yeast Cell Morphogenesis Is Regulated by a p21-Activated Kinase in the Human Pathogen Penicillium marneffei
Source: PubMed Central journal article supplement (PMC2777384; doi:10.1371/journal.ppat.1000678), 2009-11-26
Supplement: ppat.1000678.s005.pdf [file ppat.1000678.s005.pdf]

| Comparison                                                                                                      | F statistic | P value | Accept/<br>Reject<br>hypothesis | Conclusion                                               |
|-----------------------------------------------------------------------------------------------------------------|-------------|---------|---------------------------------|----------------------------------------------------------|
| All strains                                                                                                     | 206.97      | 0.000   | R                               | Difference between genotypes                             |
|                                                                                                                 | 0.63        | 0.810   | A                               | No difference between transformants of the same genotype |
| 2161<br><i>ΔpakB pakB<sup>+</sup></i><br><i>ΔpakB pakB<sup>H204G</sup></i>                                      | 4.48        | 0.056   | A                               | No difference between genotypes                          |
|                                                                                                                 | 1.15        | 0.371   | A                               | No difference between transformants of the same genotype |
| 2161<br><i>ΔpakB pakB<sup>+</sup></i><br><i>ΔpakB pakB<sup>H204G</sup></i><br><i>ΔpakB pakB<sup>ΔCRIB</sup></i> | 91.12       | 0.000   | R                               | Difference between genotypes                             |
|                                                                                                                 | 0.66        | 0.754   | A                               | No difference between transformants of the same genotype |
| 2161<br><i>ΔpakB pakB<sup>+</sup></i><br><i>ΔpakB pakB<sup>H204G</sup></i><br><i>ΔpakB pakB<sup>ΔGBB</sup></i>  | 243.65      | 0.000   | R                               | Difference between genotypes                             |
|                                                                                                                 | 0.80        | 0.629   | A                               | No difference between transformants of the same genotype |
| 2161<br><i>ΔpakB pakB<sup>+</sup></i><br><i>ΔpakB pakB<sup>H204G</sup></i><br><i>ΔpakB</i>                      | 138.41      | 0.000   | R                               | Difference between genotypes                             |
|                                                                                                                 | 1.16        | 0.366   | A                               | No difference between transformants of the same genotype |
| <i>ΔpakB pakB<sup>ΔCRIB</sup></i><br><i>ΔpakB pakB<sup>ΔGBB</sup></i>                                           | 103.90      | 0.000   | R                               | Difference between genotypes                             |
|                                                                                                                 | 0.42        | 0.856   | A                               | No difference between transformants of the same genotype |
| <i>ΔpakB pakB<sup>ΔCRIB</sup></i><br><i>ΔpakB</i>                                                               | 132.36      | 0.001   | R                               | Difference between genotypes                             |
|                                                                                                                 | 0.34        | 0.800   | A                               | No difference between transformants of the same genotype |
| <i>ΔpakB pakB<sup>ΔGBB</sup></i><br><i>ΔpakB</i>                                                                | 6.49        | 0.084   | A                               | No difference between genotypes                          |
|                                                                                                                 | 0.63        | 0.610   | A                               | No difference between transformants of the same genotype |
