# Supplementary material for: In Vivo Yeast Cell Morphogenesis Is Regulated by a p21-Activated Kinase in the Human Pathogen Penicillium marneffei
Source: PLOS journal article supplement (doi:10.1371/journal.ppat.1000678), 2009-11-26

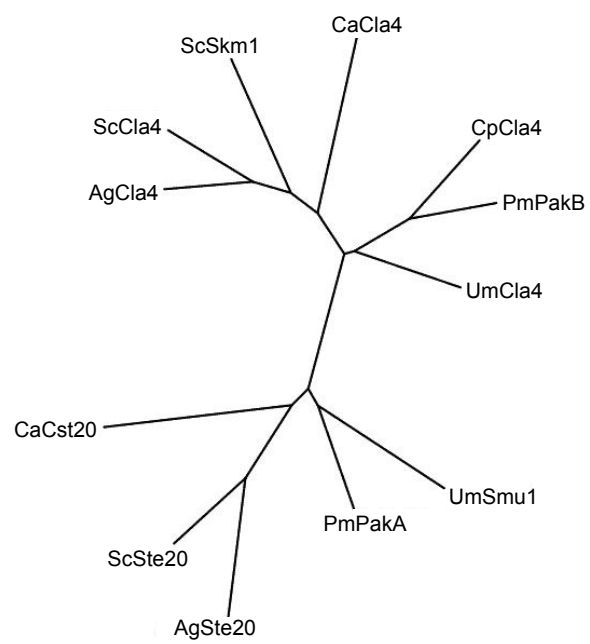

Supplement: S1 (10.1371/journal.ppat.1000678.s001) [file journal.ppat.1000678.s001]
